# Supplementary material for: Synthesis of Ni(ii)-phosphotungstic acid/nanocrystalline HZSM-5 catalyst for ultra clean gasoline in a single-stage reactor
Source: Royal Society of Chemistry journal article supplement (doi:10.1039/d1nj02067f), 2021-01-01
Supplement: d1nj02067f1.pdf [file d1nj02067f1.pdf]

Submitted to the New J. Chem.

## Supporting Information

### **Synthesis Ni(II)-phosphotungstic acid/nanocrystalline HZSM-5 catalysts for ultra clean gasoline by single-stage reactor**

Zhixin Li,<sup>a</sup> Yukun Shi,<sup>a</sup> Di Liu,<sup>a</sup> Shengjie Song,<sup>a</sup> Liu Zhao,<sup>a</sup> Ying Guo,<sup>a</sup>  
Lidong Chen,<sup>\*a</sup> Xiangsheng Wang,<sup>b</sup> Xinwen Guo,<sup>\*b</sup> and Weiguo  
Cheng<sup>\*c</sup>

- a. Faculty of Chemistry and Chemical Engineering, Liaoning Normal University, Dalian, 110629, Liaoning, China, E-mail: lidongchhm0809@163.com
- b. School of Chemical Engineering, Dalian University of Technology, Dalian, 116024, China, E-mail: guoxw@dlut.edu.cn
- c. Beijing Key Laboratory of Ionic Liquids Clean Process, Key Laboratory of Green Process and Engineering, Chinese Academy of Sciences, Institute of Process Engineering, Chinese Academy of Sciences, Beijing 100190, PR China; wgcheng@ipe.ac.cn

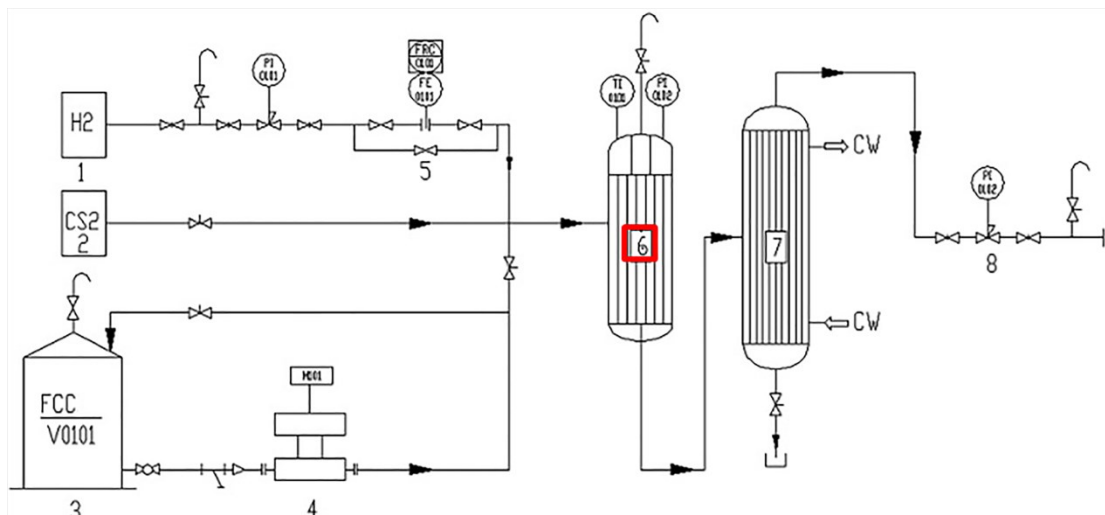

**1 Hydrogen cylinder 2 Micropump 3 Raw material storage tank 4 Raw material micro pump 5 Gas mass flowmeter 6 Reactor 7 Vapor liquid separator 8 Pressure regulator**  
 Fig. S1 Flow chart of experimental device.

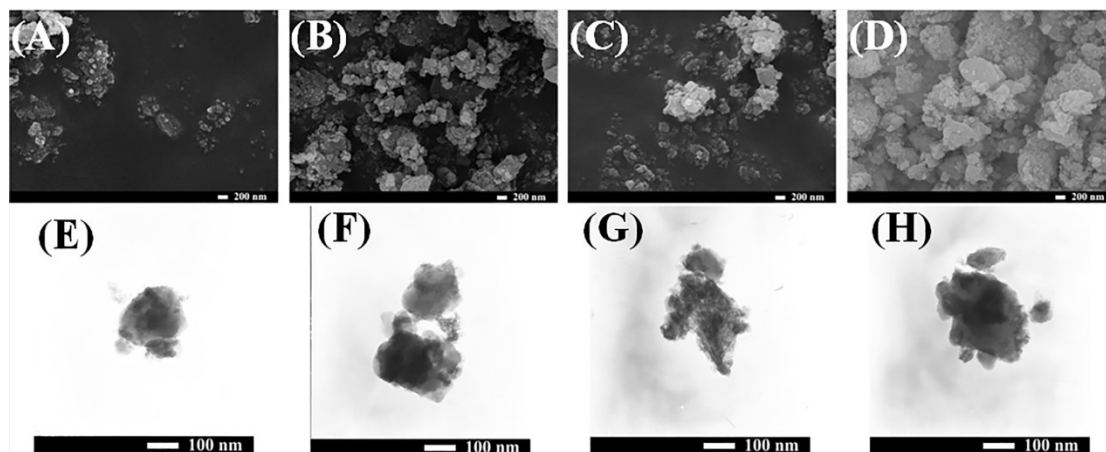

Fig. S2 SEM images of (A) Ni-Nano-Z, (B) HPW-Nano-Z, (C) La-NiPW-Nano-Z, (D) Ni-P-W-Nano-Z. and TEM images of (E) Ni-Nano-Z, (F) HPW-Nano-Z, (G) La-NiPW-Nano-Z, (H) Ni-P-W-Nano-Z.

**Table S1** IR spectra of catalysts( $\text{cm}^{-1}$ )

|         | Nano<br>-Z | Ni-<br>Nano-Z | HPW-<br>Nano-Z | NiPW-<br>Nano-Z | La-NiPW-<br>Nano-Z | Ni-P-W-<br>Nano-Z |
|---------|------------|---------------|----------------|-----------------|--------------------|-------------------|
| Si-O-Al | 960        | 960           | 960            | 960             | 960                | 960               |
| P-Oa    | –          | –             | 1082           | 1063            | 1101               | 1082              |
| W-Od    | –          | –             | 989            | 990             | –                  | 990               |
| W-Ob-W  | –          | –             | 893            | 893             | –                  | 893               |
| W-Oc-W  | –          | –             | 799            | 799             | 799                | 805               |

**Table S2** The acid type distribution of different catalysts

|                | Lewis acid ( $1451 \text{ cm}^{-1}$ )/ $\text{cm}^2/\text{g}$ | Brønsted acid ( $1547 \text{ cm}^{-1}$ )/ $\text{cm}^2/\text{g}$ | B/(B+L) |
|----------------|---------------------------------------------------------------|------------------------------------------------------------------|---------|
| Ni-Nano-Z      | 246.3                                                         | 58.5                                                             | 0.19    |
| NiPW-Nano-Z    | 46.3                                                          | 86.6                                                             | 0.65    |
| La-NiPW-Nano-Z | 121.4                                                         | 5.60                                                             | 0.04    |
| Ni-P-W-Nano-Z  | 183.6                                                         | 78.5                                                             | 0.30    |
| HPW-Nano-Z     | 34.6                                                          | 128.5                                                            | 0.79    |

All acid site are provided in  $\text{cm}^2/\text{g}$  ,  $\epsilon_L/\epsilon_B = 0.084 / 0.059$

**Table S3** Adsorption capacity of different catalysts for organic sulfur compounds (mmol/g)

| Catalyst       | TH    | BT    |
|----------------|-------|-------|
| Nano-Z         | 0.057 | 0.012 |
| Ni-Nano-Z      | 0.337 | 0.110 |
| HPW-Nano-Z     | 0.024 | 0.067 |
| NiPW-Nano-Z    | 0.021 | 0.070 |
| La-NiPW-Nano-Z | 0.058 | 0.109 |
| Ni-P-W-Nano-Z  | 0.068 | 0.028 |

Test process:

Weigh 0.04 g catalyst, put it into 2.0 ml of prepared 200 µg/g thiophene/benzothiophene n-octane solution, stand for adsorption for 3 h, measure the sulfur content in solution before and after reaction by chromatography. Analysis conditions: FID detection, PONA capillary column (0.25 µm×0.25 mm×50 m), vaporization chamber temperature 280 °C, detector temperature 280 °C, column temperature 150 °C ~ 250 °C. Then, adsorption capacity of different catalysts is calculated according to the following formula:

$$\Gamma = \frac{n_0}{m} \left(1 - \frac{A}{A_0}\right)$$

$\Gamma$ : Adsorption capacity

$n_0$ : The number of moles of adsorbate before adsorption

$m$ : Adsorbent quality

$A$ : Chromatographic peak area of adsorbate before adsorption

$A_0$ : Chromatographic peak area of adsorbate after adsorption
